# Supplementary material for: Visible light assisted photooxidative facile degradation of azo dyes in water using a green method
Source: Royal Society of Chemistry journal article supplement (doi:10.1039/d4ra01202j), 2024-01-01
Supplement: d4ra01202j1.pdf [file d4ra01202j1.pdf]

## Supporting Information

### Visible light assisted photooxidative facile degradation of azo dyes in water using green method

Muhammad Yousif<sup>1</sup>, Ahmad H. Ibrahim<sup>4</sup>, Sawsan S. Al-Rawi<sup>5</sup>, Adnan Majeed<sup>1</sup>, Muhammad Adnan Iqbal<sup>1,2\*</sup>, Muhammad Kashif<sup>1,3</sup>, Zain Ul Abidin<sup>1</sup>, Muhammad Arbaz<sup>1</sup>, Shahzaib Ali<sup>1</sup>, Syed Arslan Hussain<sup>1</sup>, Anam Shahzadi<sup>1</sup>, Mohammad Tauseef Haider<sup>1</sup>

<sup>1</sup>Department of Chemistry, University of Agriculture Faisalabad, Faisalabad-38000, Pakistan

<sup>2</sup>Synthetic Organometallic and Coordination Chemistry Laboratory, University of Agriculture Faisalabad, Faisalabad-38000, Pakistan

<sup>3</sup>Department of Mathematics and Statistics, University of Agriculture Faisalabad, Faisalabad-38000, Pakistan

<sup>4</sup>Pharmacy Department, Faculty of Pharmacy, Tishk International University, 100mt. St, near Baz intersection, Erbil, KRG, Iraq

<sup>5</sup>Biology Education Department, Faculty of Education, Tishk International University 100mt. St, near Baz intersection, Erbil, KRG/ Iraq

\*Corresponding Author: [adnan.iqbal@uaf.edu.pk](mailto:adnan.iqbal@uaf.edu.pk)

## Supplementary File

### Main Title: Visible light assisted photooxidative facile degradation of azo dyes in water using green method

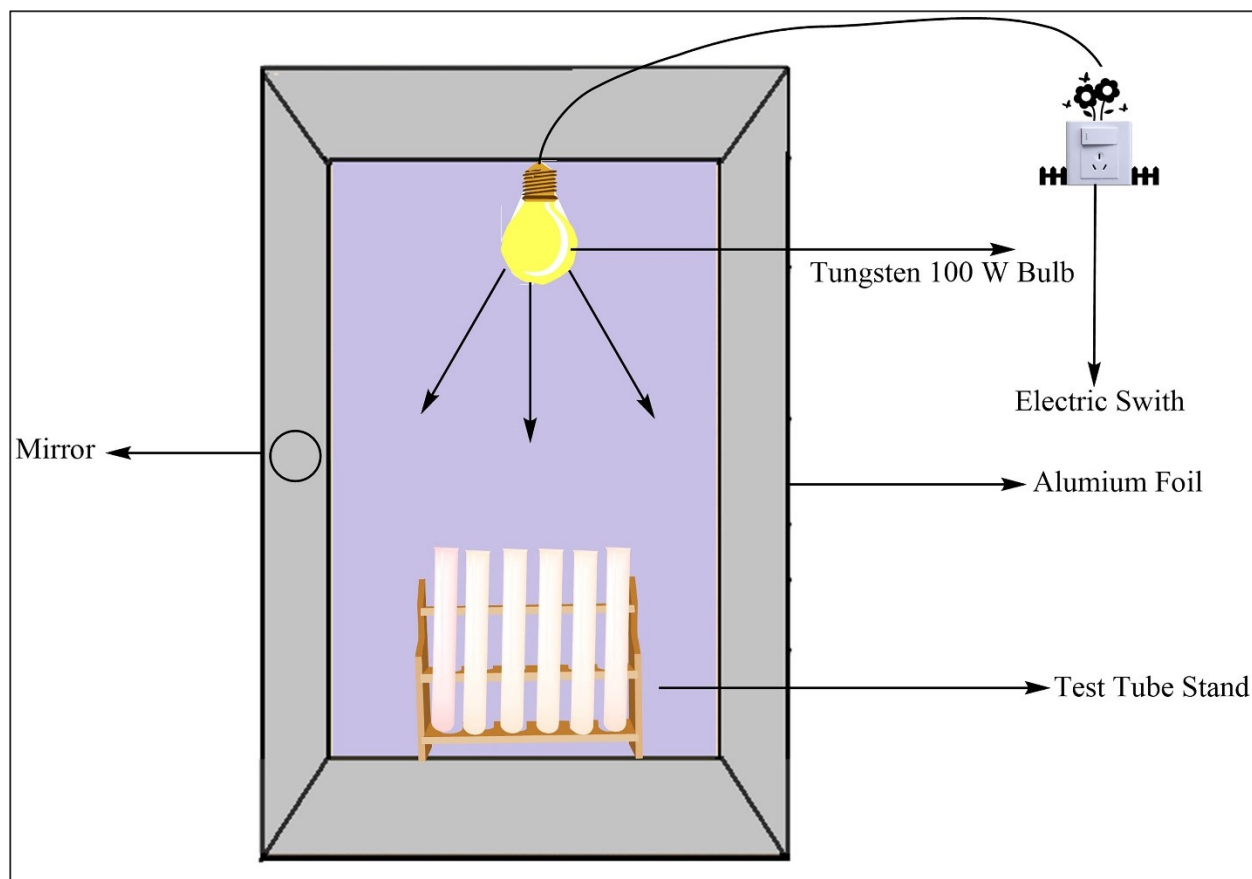

**Figure S1** shows a developed Photoreactor box for the photooxidation process.

**Table S1** shows the results obtained from the 108 experimental runs for MO, after 180 min reaction time.

|             | <b>Factor 1</b>                | <b>Factor 2</b>                           | <b>Factor 3</b> | <b>Response 1</b>             |
|-------------|--------------------------------|-------------------------------------------|-----------------|-------------------------------|
| <b>Runs</b> | <b>A: Concentration of Dye</b> | <b>B: Dose of Photooxidative Compound</b> | <b>C: Time</b>  | <b>Percentage Degradation</b> |
|             | <b>ppm</b>                     | <b>g</b>                                  | <b>Minute</b>   | <b>%</b>                      |
| <b>1</b>    | 500                            | 0.005                                     | 0               | 3.13                          |

|    |     |       |     |       |
|----|-----|-------|-----|-------|
| 2  | 500 | 0.005 | 0   | 11.76 |
| 3  | 500 | 0.005 | 0   | 1.52  |
| 4  | 500 | 0.005 | 60  | 28.17 |
| 5  | 500 | 0.005 | 60  | 23.19 |
| 6  | 500 | 0.005 | 60  | 16.42 |
| 7  | 500 | 0.005 | 120 | 53.73 |
| 8  | 500 | 0.005 | 120 | 42.03 |
| 9  | 500 | 0.005 | 120 | 41.79 |
| 10 | 500 | 0.005 | 180 | 72.39 |
| 11 | 500 | 0.005 | 180 | 62.69 |
| 12 | 500 | 0.005 | 180 | 73.13 |
| 13 | 500 | 0.01  | 0   | 6.25  |
| 14 | 500 | 0.01  | 0   | 7.35  |
| 15 | 500 | 0.01  | 0   | 6.06  |
| 16 | 500 | 0.01  | 60  | 31.34 |
| 17 | 500 | 0.01  | 60  | 34.78 |
| 18 | 500 | 0.01  | 60  | 36.76 |
| 19 | 500 | 0.01  | 120 | 59.70 |
| 20 | 500 | 0.01  | 120 | 54.41 |
| 21 | 500 | 0.01  | 120 | 55.22 |
| 22 | 500 | 0.01  | 180 | 71.64 |
| 23 | 500 | 0.01  | 180 | 69.57 |
| 24 | 500 | 0.01  | 180 | 76.12 |
| 25 | 500 | 0.015 | 0   | 8.96  |
| 26 | 500 | 0.015 | 0   | 10.14 |
| 27 | 500 | 0.015 | 0   | 7.35  |
| 28 | 500 | 0.015 | 60  | 52.94 |
| 29 | 500 | 0.015 | 60  | 33.82 |
| 30 | 500 | 0.015 | 60  | 34.85 |
| 31 | 500 | 0.015 | 120 | 77.61 |
| 32 | 500 | 0.015 | 120 | 63.08 |
| 33 | 500 | 0.015 | 120 | 65.67 |
| 34 | 500 | 0.015 | 180 | 84.85 |
| 35 | 500 | 0.015 | 180 | 76.56 |
| 36 | 500 | 0.015 | 180 | 69.23 |
| 37 | 700 | 0.005 | 0   | 8.25  |
| 38 | 700 | 0.005 | 0   | 7.22  |
| 39 | 700 | 0.005 | 0   | 7.00  |
| 40 | 700 | 0.005 | 60  | 43.75 |
| 41 | 700 | 0.005 | 60  | 31.63 |

|    |     |       |     |       |
|----|-----|-------|-----|-------|
| 42 | 700 | 0.005 | 60  | 36.36 |
| 43 | 700 | 0.005 | 120 | 60.00 |
| 44 | 700 | 0.005 | 120 | 60.64 |
| 45 | 700 | 0.005 | 120 | 61.86 |
| 46 | 700 | 0.005 | 180 | 67.78 |
| 47 | 700 | 0.005 | 180 | 67.74 |
| 48 | 700 | 0.005 | 180 | 64.13 |
| 49 | 700 | 0.01  | 0   | 10.20 |
| 50 | 700 | 0.01  | 0   | 11.00 |
| 51 | 700 | 0.01  | 0   | 8.25  |
| 52 | 700 | 0.01  | 60  | 28.87 |
| 53 | 700 | 0.01  | 60  | 37.76 |
| 54 | 700 | 0.01  | 60  | 32.26 |
| 55 | 700 | 0.01  | 120 | 48.96 |
| 56 | 700 | 0.01  | 120 | 47.37 |
| 57 | 700 | 0.01  | 120 | 51.09 |
| 58 | 700 | 0.01  | 180 | 57.89 |
| 59 | 700 | 0.01  | 180 | 59.78 |
| 60 | 700 | 0.01  | 180 | 78.02 |
| 61 | 700 | 0.015 | 0   | 10.31 |
| 62 | 700 | 0.015 | 0   | 11.88 |
| 63 | 700 | 0.015 | 0   | 9.09  |
| 64 | 700 | 0.015 | 60  | 32.29 |
| 65 | 700 | 0.015 | 60  | 42.27 |
| 66 | 700 | 0.015 | 60  | 32.65 |
| 67 | 700 | 0.015 | 120 | 53.68 |
| 68 | 700 | 0.015 | 120 | 58.33 |
| 69 | 700 | 0.015 | 120 | 61.70 |
| 70 | 700 | 0.015 | 180 | 67.02 |
| 71 | 700 | 0.015 | 180 | 65.22 |
| 72 | 700 | 0.015 | 180 | 78.02 |
| 73 | 900 | 0.005 | 0   | 12.03 |
| 74 | 900 | 0.005 | 0   | 4.44  |
| 75 | 900 | 0.005 | 0   | 3.68  |
| 76 | 900 | 0.005 | 60  | 52.00 |
| 77 | 900 | 0.005 | 60  | 30.71 |
| 78 | 900 | 0.005 | 60  | 39.23 |
| 79 | 900 | 0.005 | 120 | 76.00 |
| 80 | 900 | 0.005 | 120 | 65.08 |
| 81 | 900 | 0.005 | 120 | 69.60 |

|            |     |       |     |       |
|------------|-----|-------|-----|-------|
| <b>82</b>  | 900 | 0.005 | 180 | 92.00 |
| <b>83</b>  | 900 | 0.005 | 180 | 74.60 |
| <b>84</b>  | 900 | 0.005 | 180 | 79.03 |
| <b>85</b>  | 900 | 0.01  | 0   | 3.76  |
| <b>86</b>  | 900 | 0.01  | 0   | 4.44  |
| <b>87</b>  | 900 | 0.01  | 0   | 4.38  |
| <b>88</b>  | 900 | 0.01  | 60  | 43.65 |
| <b>89</b>  | 900 | 0.01  | 60  | 54.62 |
| <b>90</b>  | 900 | 0.01  | 60  | 40.60 |
| <b>91</b>  | 900 | 0.01  | 120 | 79.20 |
| <b>92</b>  | 900 | 0.01  | 120 | 84.13 |
| <b>93</b>  | 900 | 0.01  | 120 | 70.08 |
| <b>94</b>  | 900 | 0.01  | 180 | 86.29 |
| <b>95</b>  | 900 | 0.01  | 180 | 74.40 |
| <b>96</b>  | 900 | 0.01  | 180 | 96.06 |
| <b>97</b>  | 900 | 0.015 | 0   | 3.76  |
| <b>98</b>  | 900 | 0.015 | 0   | 5.19  |
| <b>99</b>  | 900 | 0.015 | 0   | 4.41  |
| <b>100</b> | 900 | 0.015 | 60  | 39.20 |
| <b>101</b> | 900 | 0.015 | 60  | 52.76 |
| <b>102</b> | 900 | 0.015 | 60  | 36.15 |
| <b>103</b> | 900 | 0.015 | 120 | 75.40 |
| <b>104</b> | 900 | 0.015 | 120 | 82.26 |
| <b>105</b> | 900 | 0.015 | 120 | 66.67 |
| <b>106</b> | 900 | 0.015 | 180 | 83.06 |
| <b>107</b> | 900 | 0.015 | 180 | 87.30 |
| <b>108</b> | 900 | 0.015 | 180 | 77.95 |
